# Supplementary material
Source: Springer Nature journal article supplement (https://www.springermedizin.de/resource/supplementary/12936_2012_2579_MOESM5_ESM.pdf/9543262)

**A**

2003

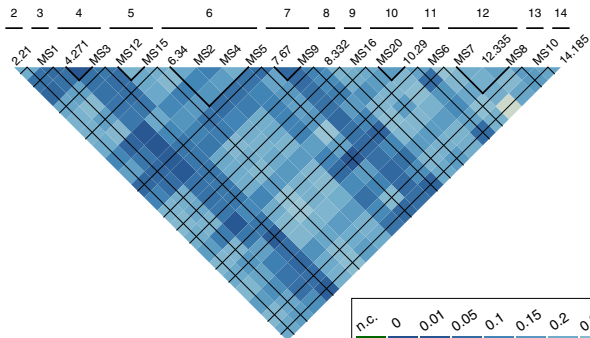**B**

2004

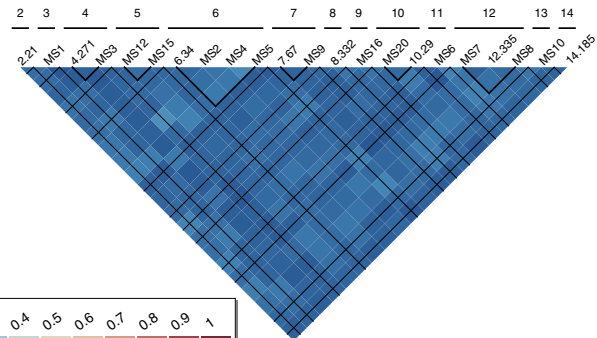**C**

2003

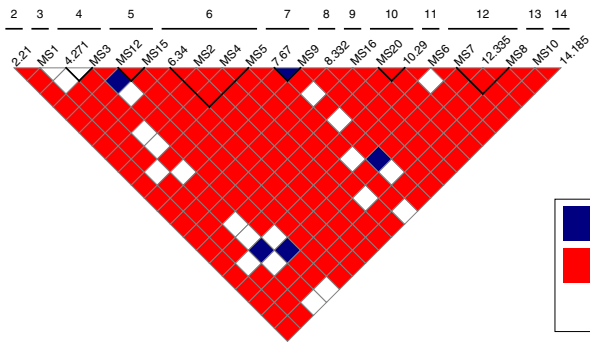**D**

2004

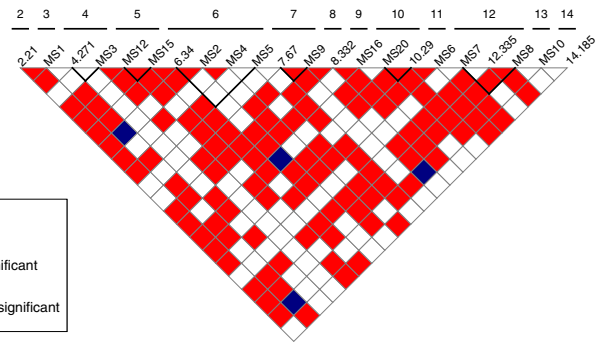

Supplement: MOESM5 [file 9543262]
